# Supplementary material for: Blood transfusions in septic shock: is 7.0g/dL really the appropriate threshold?
Source: PubMed Central journal article supplement — Rev Bras Ter Intensiva. 2015 Jan-Mar;27(1):36–43. doi: 10.5935/0103-507X.20150007 (PMC4396895; doi:10.5935/0103-507x.20150007), 2015
Supplement: rbti-27-01-0036-s01.pdf [file rbti-27-01-0036-s01.pdf]

## Blood transfusions in septic shock: is 7.0g/dL really the appropriate threshold?

### *Transfusões de sangue no choque séptico: 7,0g/dL é mesmo o limite adequado?*

Bruno Franco Mazza<sup>1</sup>, Flavio Geraldo Rezende Freitas<sup>1</sup>, Melca Maria Oliveira Barros<sup>2</sup>, Luciano Cesar Pontes Azevedo<sup>1</sup>, Flavia Ribeiro Machado<sup>1</sup>

**Table S1** - Pre- and post-transfusion comparison of lactate, central venous oxygen saturation and hemoglobin levels in patients with high lactate levels at baseline

| Variables              | Liberal<br>(N = 14)      | Restrictive<br>(N = 20)  | p value* |
|------------------------|--------------------------|--------------------------|----------|
| Hemoglobin (g/dL)      |                          |                          |          |
| PreT Hb                | 8.4 (8.2 to 8.7)         | 6.8 (6.6 to 6.9)         | < 0.0001 |
| PosT Hb                | 9.4 (9.0 to 9.6)         | 7.5 (7.4 to 7.8)         | < 0.0001 |
| Difference             | 0.9 (0.7 to 1.0)         | 0.8 (0.7 to 1.1)         |          |
| p value <sup>#</sup>   | 0.001                    | < 0.0001                 |          |
| ScvO <sub>2</sub> (%)  |                          |                          |          |
| PreT ScvO <sub>2</sub> | 71.0 (68.0 to 72.5)      | 66.0 (62.5 to 70.5)      | 0.03     |
| PosT ScvO <sub>2</sub> | 72.0 (71.0 to 74.5)      | 70.5 (66.5 to 73.0)      | 0.29     |
| Difference             | 3.5 (- 2.2 to 5.5)       | 5.0 (2.0 to 8.0)         |          |
| p value <sup>#</sup>   | 0.13                     | 0.001                    |          |
| Lactate (mMol/L)       |                          |                          |          |
| PreT lactate           | 2.96 (2.61 to 3.69)      | 2.97 (2.48 to 3.78)      | 0.75     |
| PosT lactate           | 2.62 (2.16 to 3.16)      | 2.60 (2.22 to 3.11)      | 0.84     |
| Difference             | -0.44 (- 0.68 to - 0.08) | -0.24 (- 0.52 to - 0.09) |          |
| p value <sup>#</sup>   | 0.02                     | 0.001                    |          |

Hb - hemoglobin; ScvO<sub>2</sub> - central venous oxygen saturation; PreT - pre-transfusion; PosT - post-transfusion. The results are expressed as the median values (25 - 75%). <sup>#</sup> p value refers to comparison within the same group (Wilcoxon rank test). \* p value refers to differences between groups (Mann-Whitney test).

**Table S2** - Pre- and post-transfusion comparison of lactate, central venous oxygen saturation and hemoglobin levels in patients with low central venous oxygen saturation at baseline

| Variables              | Liberal<br>(N = 12)       | Restrictive<br>(N = 20)   | p value* |
|------------------------|---------------------------|---------------------------|----------|
| Hemoglobin (g/dL)      |                           |                           |          |
| PreT Hb                | 8.2 (8.1 to 8.5)          | 6.8 (6.7 to 6.9)          | < 0.0001 |
| PosT Hb                | 9.2 (9.1 to 9.5)          | 7.5 (7.4 to 7.8)          | < 0.0001 |
| Difference             | 0.9 (0.7 to 1.0)          | 0.8 (0.7 to 0.9)          |          |
| p value <sup>#</sup>   | < 0.0001                  | < 0.0001                  |          |
| ScvO <sub>2</sub> (%)  |                           |                           |          |
| PreT ScvO <sub>2</sub> | 67.0 (64.7 to 68.2)       | 65.0 (60.5 to 68.0)       | 0.18     |
| PosT ScvO <sub>2</sub> | 71.5 (69.8 to 72.2)       | 70.5 (66.5 to 73.0)       | 0.53     |
| Difference             | 4.5 (- 0.2 to 6.0)        | 5.0 (4.0 to 7.5)          |          |
| p value <sup>#</sup>   | 0.02                      | < 0.0001                  |          |
| Lactate (mMol/L)       |                           |                           |          |
| PreT lactate           | 2.51 (1.86 to 3.22)       | 2.67 (2.19 to 3.27)       | 0.38     |
| PosT lactate           | 2.24 (1.90 to 2.81)       | 2.42 (1.96 to 3.02)       | 0.34     |
| Difference             | - 0.50 (- 0.61 to - 0.09) | - 0.20 (- 0.46 to - 0.05) |          |
| p value <sup>#</sup>   | 0.01                      | 0.003                     |          |

Hb - hemoglobin; ScvO<sub>2</sub> - central venous oxygen saturation; PreT - pre-transfusion; PosT - post-transfusion. The results are expressed as the median values (25 - 75%). <sup>#</sup> p value refers to comparison within the same group (Wilcoxon rank test). \* p value refers to differences between groups (Mann-Whitney test).

**Table S3** - Pre- and post-transfusion comparison of perfusion parameters and hemoglobin levels considering only the first transfusion of each patient

| Groups                      | Liberal                   | Restrictive               | p value* |
|-----------------------------|---------------------------|---------------------------|----------|
| Global                      | (N = 24)                  | (N = 22)                  |          |
| Hemoglobin (g/dL)           |                           |                           |          |
| PreT Hb                     | 8.4 (8.1 to 8.6)          | 6.8 (6.7 to 6.9)          | < 0.0001 |
| PosT Hb                     | 9.2 (9.1 to 9.5)          | 7.6 (7.5 to 7.8)          | < 0.0001 |
| Difference                  | 0.9 (0.8 to 1.1)          | 0.8 (0.8 to 1.0)          |          |
| p value <sup>#</sup>        | < 0.0001                  | < 0.0001                  |          |
| ScvO <sub>2</sub> (%)       |                           |                           |          |
| PreT ScvO <sub>2</sub>      | 71.0 (68.0 to 72.0)       | 67.5 (63.5 to 69.2)       | 0.001    |
| PosT ScvO <sub>2</sub>      | 71.5 (69.2 to 72.7)       | 71.0 (67.5 to 73.0)       | 0.62     |
| Difference                  | 1.5 (- 2.0 to 3.7)        | 5.0 (2.7 to 6.5)          |          |
| p value <sup>#</sup>        | 0.45                      | < 0.0001                  |          |
| Lactate (mMol/L)            |                           |                           |          |
| PreT lactate                | 1.97(1.64 to 2.66)        | 2.48 (1.90 to 3.20)       | 0.08     |
| PosT lactate                | 2.06 (1.73 to 2.40)       | 2.30 (1.78 to 2.87)       | 0.23     |
| Difference                  | - 0.09 (- 0.45 to 0.19)   | - 0.19 (- 0.48 to - 0.05) |          |
| p value <sup>#</sup>        | 0.42                      | 0.003                     |          |
| Hyperlactatemia group       |                           |                           |          |
|                             | (N = 09)                  | (N = 14)                  |          |
| Hemoglobin (g/dL)           |                           |                           |          |
| PreT Hb                     | 8.2 (8.1 to 8.5)          | 6.8 (6.6 to 6.9)          | < 0.0001 |
| PosT Hb                     | 9.1 (9.0 to 9.5)          | 7.6 (7.4 to 7.9)          | < 0.0001 |
| Difference                  | 0.9 (0.8 to 1.1)          | 0.8 (0.7 to 1.1)          |          |
| p value <sup>#</sup>        | 0.007                     | 0.001                     |          |
| ScvO <sub>2</sub> (%)       |                           |                           |          |
| PreT ScvO <sub>2</sub>      | 69.0 (66.5 to 71.5)       | 64.0 (61.0 to 68.0)       | 0.01     |
| PosT ScvO <sub>2</sub>      | 72.0 (70.0 to 72.5)       | 69.0 (65.7 to 73.0)       | 0.22     |
| Difference                  | 4.0 (- 1.0 to 7.0)        | 5.0 (4.0 to 8.0)          |          |
| p value <sup>#</sup>        | 0.19                      | 0.001                     |          |
| Lactate (mMol/L)            |                           |                           |          |
| PreT lactate                | 3.12 (2.63 to 3.88)       | 3.12 (2.48 to 4.10)       | 0.82     |
| PosT lactate                | 2.51 (2.23 to 3.11)       | 2.76 (2.32 to 3.15)       | 0.85     |
| Difference                  | - 0.50 (- 0.84 to - 0.14) | - 0.31 (- 0.54 to - 0.08) |          |
| p value <sup>#</sup>        | 0.08                      | 0.003                     |          |
| Low ScvO <sub>2</sub> group |                           |                           |          |
|                             | (N = 10)                  | (N = 17)                  |          |
| Hemoglobin (g/dL)           |                           |                           |          |
| PreT Hb                     | 8.2 (8.1 to 8.5)          | 6.8 (6.6 to 6.9)          | < 0.0001 |
| PosT Hb                     | 9.1 (9.0 to 9.5)          | 7.5 (7.4 to 7.8)          | < 0.0001 |
| Difference                  | 0.9 (0.8 to 1.0)          | 0.8 (0.7 to 1.0)          |          |
| p value <sup>#</sup>        | 0.005                     | < 0.0001                  |          |
| ScvO <sub>2</sub> (%)       |                           |                           |          |
| PreT ScvO <sub>2</sub>      | 67.5 (64.7 to 69.7)       | 64.0 (61.0 to 68.0)       | 0.08     |
| PosT ScvO <sub>2</sub>      | 70.5 (69.0 to 72.0)       | 70.0 (66.0 to 73.0)       | 0.82     |
| Difference                  | 3.5 (- 1.5 to 6.2)        | 5.0 (4.0 to 7.0)          |          |
| p value <sup>#</sup>        | 0.06                      | < 0.0001                  |          |

Continue...

## ... continuation

| Groups               | Liberal                   | Restrictive               | p value* |
|----------------------|---------------------------|---------------------------|----------|
| Lactate (mMol/L)     |                           |                           |          |
| PreT lactate         | 2.64 (1.96 to 3.40)       | 2.91 (2.26 to 3.56)       | 0.54     |
| PosT lactate         | 2.34 (2.06 to 2.98)       | 2.43 (2.01 to 3.09)       | 0.52     |
| Difference           | - 0.41 (- 0.62 to - 0.01) | - 0.19 (- 0.49 to - 0.05) |          |
| p value <sup>#</sup> | 0.05                      | 0.005                     |          |

Hb - hemoglobin; ScvO<sub>2</sub> - central venous oxygen saturation; PreT - pre transfusion; PosT - post transfusion. The results are expressed as median (25 - 75%). \* p value refers to comparison within the same group (Wilcoxon rank test). # p value refers to differences between groups (Mann-Whitney test).

**Table S4** - Pre- and post-transfusion comparison of perfusion parameters and hemoglobin levels in patients without signs of hypoperfusion

| Groups                           | Liberal                 | Restrictive             | p value* |
|----------------------------------|-------------------------|-------------------------|----------|
| Normal baseline lactate          |                         |                         |          |
|                                  | (N = 25)                | (N = 15)                |          |
| Hemoglobin (g/dL)                |                         |                         |          |
| PreT Hb                          | 8.5 (8.2 to 8.7)        | 6.7 (6.7 to 6.8)        | < 0.0001 |
| PosT Hb                          | 9.4 (9.2 to 9.5)        | 7.6 (7.5 to 7.8)        | < 0.0001 |
| Difference                       | 0.9 (0.8 to 1.1)        | 0.9 (0.8 to 1.1)        |          |
| p value <sup>#</sup>             | < 0.0001                | 0.001                   |          |
| ScvO <sub>2</sub> (%)            |                         |                         |          |
| PreT ScvO <sub>2</sub>           | 72.0 (71.0 to 74.5)     | 71.0 (68.0 to 72.0)     | 0.14     |
| PosT ScvO <sub>2</sub>           | 71.0 (70.0 to 73.0)     | 74.0 (72.0 to 77.0)     | 0.004    |
| Difference                       | - 1.0 (- 3.0 to 2.0)    | 3.0 (2.0 to 5.0)        |          |
| P value <sup>#</sup>             | 0.21                    | 0.002                   |          |
| Lactate (mMol/L)                 |                         |                         |          |
| PreT lactate                     | 1.80 (1.48 to 1.91)     | 1.91 (1.81 to 2.12)     | 0.05     |
| PosT lactate                     | 1.80 (1.41 to 2.02)     | 1.81 (1.61 to 2.12)     | 0.57     |
| Difference                       | 0.00 (- 0.10 to 0.19)   | - 0.09 (- 0.30 to 0.28) |          |
| p value <sup>#</sup>             | 0.41                    | 0.89                    |          |
| Baseline ScvO <sub>2</sub> > 70% |                         |                         |          |
|                                  | (N = 21)                | (N = 10)                |          |
| Hemoglobin (g/dL)                |                         |                         |          |
| PreT Hb                          | 8.5 (8.2 to 8.7)        | 6.7 (6.6 to 6.8)        | < 0.0001 |
| PosT Hb                          | 9.4 (9.2 to 9.5)        | 7.6 (7.5 to 7.8)        | < 0.0001 |
| Difference                       | 0.9 (0.8 to 1.1)        | 0.9 (0.8 to 0.9)        |          |
| p value <sup>#</sup>             | < 0.0001                | 0.004                   |          |
| ScvO <sub>2</sub> (%)            |                         |                         |          |
| PreT ScvO <sub>2</sub>           | 72.0 (71.0 to 74.0)     | 71.5 (71.0 to 72.2)     | 0.17     |
| PosT ScvO <sub>2</sub>           | 72.0 (70.0 to 73.0)     | 73.0 (71.7 to 76.7)     | 0.10     |
| Difference                       | - 1.0 (- 2.0 to 2.0)    | 2.5 (0.7 to 4.25)       |          |
| p value <sup>#</sup>             | 0.49                    | 0.02                    |          |
| Lactate (mMol/L)                 |                         |                         |          |
| PreT lactate                     | 1.86 (1.48 to 2.56)     | 2.18 (1.80 to 2.44)     | 0.17     |
| PosT lactate                     | 1.90 (1.60 to 2.21)     | 2.11 (1.80 to 2.47)     | 0.32     |
| Difference                       | - 0.06 (- 0.10 to 0.19) | - 0.20 (- 0.38 to 0.28) |          |
| p value <sup>#</sup>             | 0.71                    | 0.38                    |          |

Hb - hemoglobin; ScvO<sub>2</sub> - central venous oxygen saturation; PreT - pre transfusion; PosT - post transfusion. The results are expressed as median (25 - 75%). \* p value refers to comparison within the same group (Wilcoxon rank test). # p value refers to differences between groups (Mann-Whitney test).

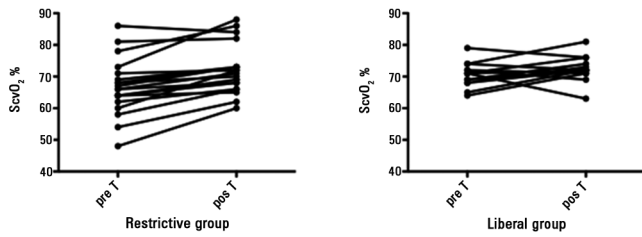

**Figure S1** - Pre- and post-transfusion central venous oxygen saturation levels in the subgroup with low baseline central venous oxygen saturation levels. In both groups (i.e., liberal and restrictive), the central venous oxygen saturation levels improved after transfusion ( $p < 0.05$ , Wilcoxon paired test). ScvO<sub>2</sub> - central venous oxygen saturation; PreT - pre transfusion; PosT - pos transfusion.
